# Supplementary material
Source: PubMed Central journal article supplement (PMC18903)
Supplement: pnas_230282097_1.pdf [file pnas_230282097_1.pdf]

## Mean-Curvature Motion

**Achilleas S. Frangakis and Reiner Hegerl**

The mathematical background of MCM can be derived from the partial differential equation of normal linear diffusion

$$\frac{I}{t} = \text{div}(\nabla I) \quad (1)$$

which describes the temporal evolution of an image  $I = I(\mathbf{x}, t)$  starting from the image  $I_0 = I(\mathbf{x}, 0)$  at the time  $t=0$ .  $\nabla I$  denotes the gradient of the image with respect to the coordinates  $\mathbf{x}$  in a space of arbitrary dimensions. As well known, the process equilibrates the gray level differences such that the image becomes smoother with increasing time (1). Using  $\text{Hess}(I)$  to denote the matrix containing all spatial second order derivatives, the equation can be rewritten as follows

$$\frac{I}{t} = \text{div}(\nabla I) = |\nabla I| \text{div} \left( \frac{\nabla I}{|\nabla I|} \right) + \frac{I}{|\nabla I|} \text{Hess}(I) \cdot \frac{\nabla I}{|\nabla I|} \quad (2)$$

where the second term describes smoothing in the direction of the gradient. Suppressing this term, one obtains the equation

$$\frac{I}{t} = |\nabla I| \text{div} \left( \frac{\nabla I}{|\nabla I|} \right) \quad (3)$$

for a nonlinear anisotropic diffusion process (2), which was derived to improve edge preservation by smoothing the image only along level lines and not across edges.

Regarding a boundary passing through the point  $\mathbf{x}$  of the image  $I(\mathbf{x}, t)$ , either a level line in two dimensions or a isosurface in three dimensions, equation 3 can also be interpreted as a propagation of this boundary in the direction of its inward normal with a speed proportional to its local curvature (1). As can be realized after some

calculation, the expression  $\text{div} \left( \frac{\mathbf{I}}{\|\mathbf{I}\|} \right)$  describes the curvature of a line in two dimensions

$$\text{div} \frac{\mathbf{I}}{\|\mathbf{I}\|} = \frac{I_{xx}I_y^2 - 2I_{xy}I_xI_y + I_{yy}I_x^2}{(I_x^2 + I_y^2)^{3/2}} \quad (4)$$

as well as the mean curvature of a surface in three dimensions

$$\text{div} \frac{\mathbf{I}}{\|\mathbf{I}\|} = \frac{I_{xx}(I_y^2 + I_z^2) + I_{yy}(I_x^2 + I_z^2) + I_{zz}(I_x^2 + I_y^2) - 2I_{xy}I_xI_y - 2I_{xz}I_xI_z - 2I_{yz}I_yI_z}{(I_x^2 + I_y^2 + I_z^2)^{3/2}} \quad (5)$$

For this reason, "mean-curvature motion" has been introduced to name the process corresponding to equation 3 (2).

For the present implementation we used a discretization scheme similar to that proposed by Osher and Sethian (3). Using the abbreviations

$$\begin{aligned} D^{+x}I &= \frac{1}{h} (I(x+h, y, z) - I(x, y, z)) \\ D^{-x}I &= \frac{1}{h} (I(x, y, z) - I(x-h, y, z)) \\ D^0I &= \frac{1}{2h} (I(x+h, y, z) + I(x-h, y, z)) \\ D^{0x0}I &= \frac{1}{h^2} (I(x+h, y, z) - 2I(x, y, z) + I(x-h, y, z)), \end{aligned}$$

with corresponding definitions for y and z, the image evolution was calculated in the 2-D and 3-D case according to

$$\begin{aligned} D^{+t}I &= -t \left[ (D^{0x}I)^2 D^{0y0}I + (D^{0y}I)^2 D^{0x0}I \right. \\ &\quad \left. - \max(D^{0x}I, D^{0y}I, 0)(D^{-x+y}I + D^{+x-y}I) - \min(D^{0x}I, D^{0y}I, 0)(D^{+x+y}I + D^{-x-y}I) \right] / \\ &\quad \left[ (D^{0x}I)^2 + (D^{0y}I)^2 \right] \end{aligned}$$

and

$$D^{+t}I = -t \left[ (D^{0x}I)^2 (D^{0y0}I + D^{0z0}I) + (D^{0y}I)^2 (D^{0x0}I + D^{0z0}I) + (D^{0z}I)^2 (D^{0x0}I + D^{0y0}I) \right]$$

$$\begin{aligned}
& -\max(D^{0x} I \ D^{0y} I, 0)(D^{-x+y} I + D^{+x-y} I) - \min(D^{0x} I \ D^{0y} I, 0)(D^{+x+y} I + D^{-x-y} I) \\
& -\max(D^{0x} I \ D^{0z} I, 0)(D^{-x+z} I + D^{+x-z} I) - \min(D^{0x} I \ D^{0z} I, 0)(D^{+x+z} I + D^{-x-z} I) \\
& -\max(D^{0y} I \ D^{0z} I, 0)(D^{-y+z} I + D^{+y-z} I) - \min(D^{0y} I \ D^{0z} I, 0)(D^{+y+z} I + D^{-y-z} I) \Big/ \\
& \Big/ \left[ (D^{0x} I)^2 + (D^{0y} I)^2 + (D^{0z} I)^2 \right]
\end{aligned}$$

respectively.

## References

1. Sethian, J. A. (1985) *Communications in Mathematical Physics* **101**, 487-499.
2. Alvarez, L., Guichard, F., Lions, P. L. & Morel, J. M. (1993) *Archive for Rational Mechanics and Analysis* **123**, 199-257.
3. Osher, S. & Sethian, J. A. (1988) *Journal of Computational Physics* **79**, 12-49.
